# Supplementary material for: Two 2-D multifunctional cobalt(ii) compounds: field-induced single-ion magnetism and catalytic oxidation of benzylic C–H bonds
Source: Royal Society of Chemistry journal article supplement (doi:10.1039/c6dt04551k), 2017-01-01

## Supporting Information for

# Two 2-D multifunctional cobalt(II) compounds: Field-induced single-ion magnetism and catalytic oxidation of benzylic C-H bonds

Ranran Ma<sup>a</sup>, Zhiwei Chen<sup>a</sup>, Fan Cao<sup>b</sup>, Suna Wang<sup>a\*</sup>, Xianqiang Huang<sup>a\*</sup>, Yunwu Li<sup>a</sup>,  
Jing Lu<sup>a</sup>, Dacheng Li<sup>a</sup>, Jianmin Dou<sup>a\*</sup>

[a] Shandong Provincial Key Laboratory of Chemical Energy Storage and Novel Cell Technology, School of Chemistry and Chemical Engineering, Liaocheng University, Liaocheng, 252059, P. R. China. Tel: +86-0635-8230669.

[b] Qingdao University of Science & Technology, College of Chemistry and Molecular Engineering, 266042, P. R. China. Tel: +86-0532-84022681.

Email: [wangsuna@lcu.edu.cn](mailto:wangsuna@lcu.edu.cn); [hxq@lcu.edu.cn](mailto:hxq@lcu.edu.cn); [jmdou@lcu.edu.cn](mailto:jmdou@lcu.edu.cn)

**Table S1.** Selected bond distances and angles of compounds **1** and **2**.

| <b>1</b>        |            |                 |            |
|-----------------|------------|-----------------|------------|
| Co(1)-O(1)      | 2.135(4)   | Co(1)-O(7)      | 2.081(3)   |
| Co(1)-O(8)      | 2.134(4)   | Co(1)-O(9)      | 2.099(3)   |
| Co(1)-N(1)      | 2.170(4)   | Co(1)-N(2)      | 2.121(4)   |
| O(7)-Co(1)-O(9) | 94.85(14)  | O(7)-Co(1)-N(2) | 86.75(14)  |
| O(7)-Co(1)-O(8) | 89.25(13)  | O(9)-Co(1)-N(2) | 88.43(15)  |
| O(9)-Co(1)-O(8) | 90.50(14)  | O(7)-Co(1)-O(1) | 89.22(14)  |
| N(2)-Co(1)-O(8) | 175.76(14) | O(9)-Co(1)-O(1) | 174.86(14) |
| N(2)-Co(1)-O(1) | 94.94(15)  | O(9)-Co(1)-N(1) | 89.98(14)  |
| O(8)-Co(1)-O(1) | 86.41(14)  | N(2)-Co(1)-N(1) | 89.71(15)  |
| O(7)-Co(1)-N(1) | 173.93(15) | O(8)-Co(1)-N(1) | 94.39(15)  |
| O(1)-Co(1)-N(1) | 86.17(15)  |                 |            |

  

| <b>2</b>         |            |                  |            |
|------------------|------------|------------------|------------|
| Co(1)-O(1)       | 2.068(3)   | Co(1)-O(2)       | 2.257(3)   |
| Co(1)-O(7A)      | 2.144(3)   | Co(1)-O(8A)      | 2.163(3)   |
| Co(1)-N(1)       | 2.093(3)   | Co(1)-N(2)       | 2.089(3)   |
| O(1)-Co(1)-N(2)  | 95.88(13)  | O(1)-Co(1)-O(7A) | 106.52(12) |
| O(1)-Co(1)-N(1)  | 96.94(13)  | O(1)-Co(1)-O(8A) | 165.12(12) |
| O(7A)-Co(1)-O(2) | 92.93(12)  | O(8A)-Co(1)-O(2) | 110.56(13) |
| N(1)-Co(1)-O(2)  | 91.46(13)  | N(1)-Co(1)-O(8A) | 95.04(13)  |
| N(1)-Co(1)-O(7A) | 155.11(14) | N(2)-Co(1)-N(1)  | 91.92(14)  |
| N(2)-Co(1)-O(7A) | 93.81(13)  | N(2)-Co(1)-O(2)  | 156.30(13) |
| N(2)-Co(1)-O(8A) | 92.49(13)  |                  |            |

Symmetry code for compound **2**, A: -x+2, -y+1, -z+2.

**Fig. S1.** 3D stacking interactions of compounds **1** (a) and **2** (b).

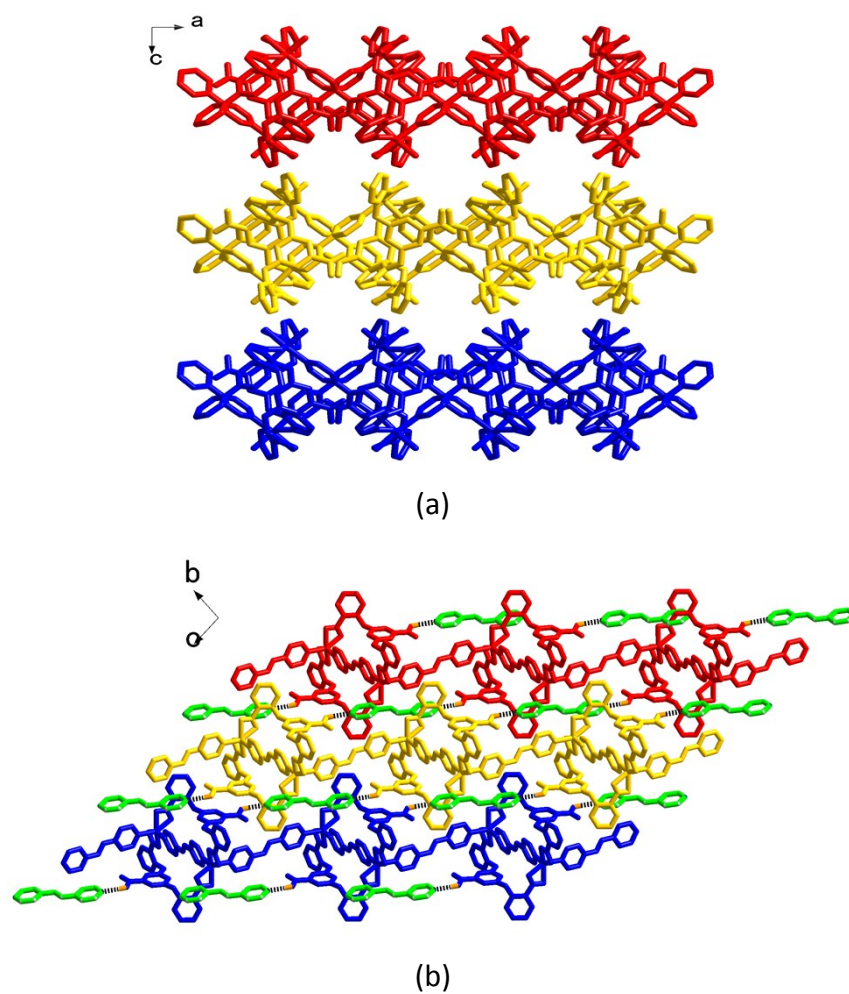

**Fig. S2.** Powder XRD of compounds **1** (a) and **2** (b).

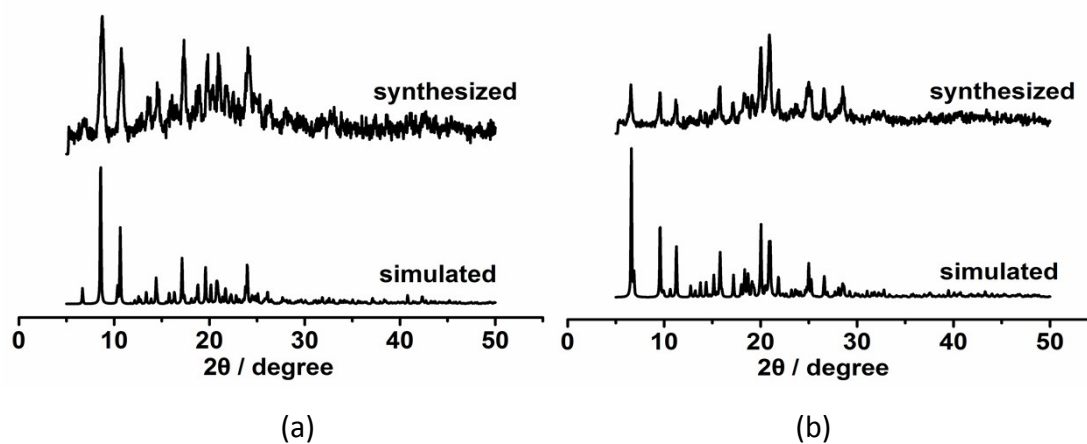

**Fig. S3.** M-H data of compounds **1** (a) and **2** (b) at 2.0K.

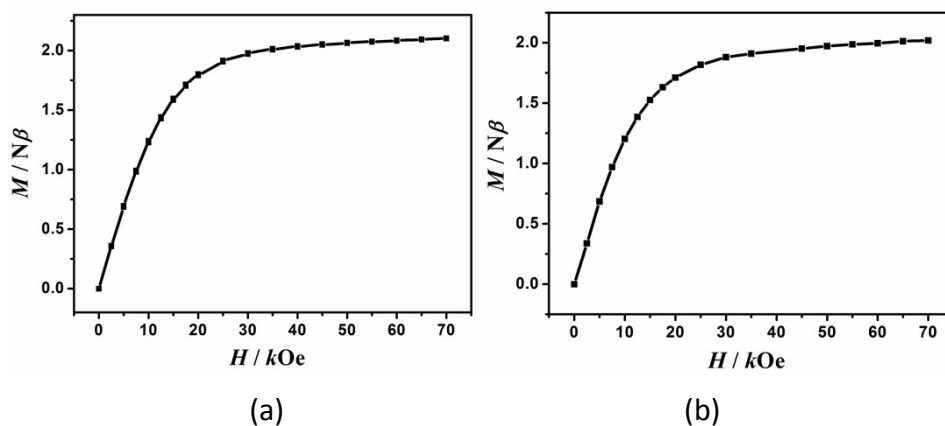

**Fig. S4.** The temperature dependence of the in-phase ( $\chi'$ ) and out-of-phase ( $\chi''$ ) ac susceptibilities at different frequencies with an oscillation of zero Oe dc field for complex **1** ((a)) and **2** ((b)), respectively.

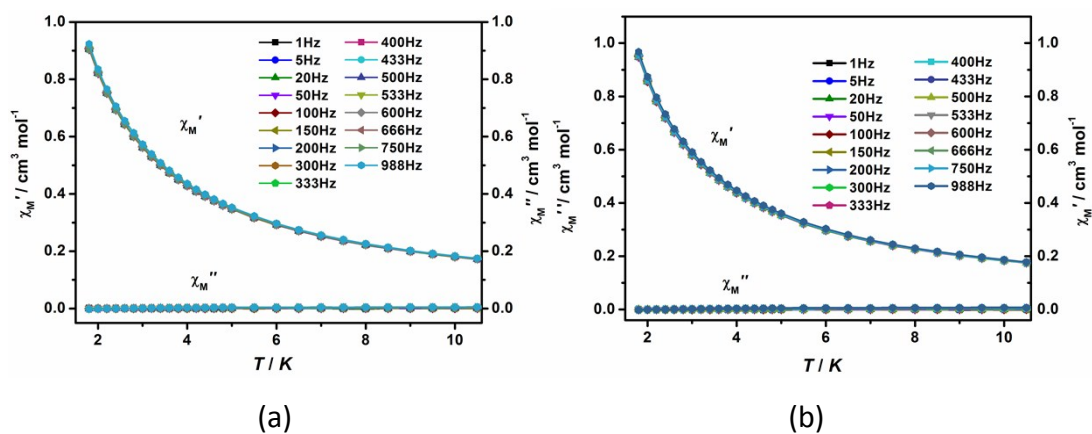

**Table S2.** The relaxation fitting parameters from Least-Squares Fitting of  $\chi(\omega)$  data for compound **1** from 1.8 to 6.0 K under 2 kOe dc field.

| $T$ | $\chi_{s,tot}$         | $\Delta\chi_1$ | $\tau_1$ | $\alpha_1$ | $\Delta\chi_2$ | $\tau_2$ | $\alpha_2$ |
|-----|------------------------|----------------|----------|------------|----------------|----------|------------|
| 1.8 | 0.114                  | 0.339          | 0.221    | 0.439      | 0.552          | 0.00225  | 0.0896     |
| 2.2 | 0.078                  | 0.311          | 0.070    | 0.612      | 0.450          | 0.00175  | 0.0619     |
| 2.6 | 0.053                  | 0.227          | 0.081    | 0.728      | 0.442          | 0.00144  | 0.0756     |
| 3.0 | $0.79 \times 10^{-7}$  | 0.268          | 0.120    | 0.865      | 0.410          | 0.00114  | 0.0677     |
| 3.5 | $0.108 \times 10^{-6}$ | 0.184          | 0.167    | 0.917      | 0.387          | 0.000827 | 0.0704     |
| 4.0 | $0.231 \times 10^{-6}$ | 0.138          | 0.202    | 0.953      | 0.356          | 0.000574 | 0.0616     |
| 4.5 | $0.137 \times 10^{-6}$ | 0.112          | 0.427    | 0.977      | 0.325          | 0.000375 | 0.0470     |
| 5.0 | $0.307 \times 10^{-6}$ | 0.0869         | 0.654    | 0.992      | 0.301          | 0.000232 | 0.0359     |
| 5.5 | $0.848 \times 10^{-6}$ | 0.0604         | 0.864    | 0.988      | 0.286          | 0.000137 | 0.0296     |
| 6.0 | $0.197 \times 10^{-5}$ | 0.0143         | 0.634    | 0.988      | 0.284          | 0.000079 | 0.0265     |

**Table S3.** The relaxation fitting parameters from Least-Squares Fitting of  $\chi(\omega)$  data for compound **2** from 1.8 to 6.0 K under 2 kOe dc field.

| $T$ | $\chi_{s,tot}$         | $\Delta\chi_1$ | $\tau_1$ | $\alpha_1$              | $\Delta\chi_2$ | $\tau_2$ | $\alpha_2$              |
|-----|------------------------|----------------|----------|-------------------------|----------------|----------|-------------------------|
| 1.8 | 0.0282                 | 0.182          | 0.051    | 0.0668                  | 0.650          | 0.00096  | 0.134                   |
| 2.2 | $0.212 \times 10^{-7}$ | 0.135          | 0.075    | 0.156                   | 0.632          | 0.00062  | 0.176                   |
| 2.6 | $0.43 \times 10^{-7}$  | 0.0750         | 0.070    | 0.142                   | 0.582          | 0.00044  | 0.166                   |
| 3.0 | $0.138 \times 10^{-6}$ | 0.0293         | 0.047    | $0.659 \times 10^{-7}$  | 0.536          | 0.00030  | 0.153                   |
| 3.5 | $0.150 \times 10^{-6}$ | 0.0205         | 0.077    | $0.866 \times 10^{-7}$  | 0.480          | 0.00018  | 0.121                   |
| 4.0 | $0.120 \times 10^{-6}$ | 0.0125         | 0.149    | $0.192 \times 10^{-6}$  | 0.430          | 0.00010  | 0.0789                  |
| 4.5 | $0.175 \times 10^{-6}$ | 0.0095         | 0.221    | $0.483 \times 10^{-6}$  | 0.388          | 0.000061 | 0.0331                  |
| 5.0 | $0.235 \times 10^{-6}$ | 0.0063         | 0.238    | $0.945 \times 10^{-13}$ | 0.353          | 0.000036 | 0.0131                  |
| 5.5 | $0.447 \times 10^{-6}$ | 0.0091         | 0.264    | $0.849 \times 10^{-14}$ | 0.324          | 0.000022 | $0.361 \times 10^{-12}$ |
| 6.0 | $0.245 \times 10^{-6}$ | 0.0015         | 0.166    | $0.235 \times 10^{-13}$ | 0.299          | 0.000015 | $0.319 \times 10^{-12}$ |

**Table S4.** Selective oxidation of diphenylmethane by catalyst using TBHP oxidant<sup>[a]</sup>

| Entry             | Solvent                          | T(°) | t(h) | TBHP/substrate | Conv.(%) | Sele.(%) <sup>[b]</sup> |
|-------------------|----------------------------------|------|------|----------------|----------|-------------------------|
| 1                 | C <sub>6</sub> H <sub>5</sub> Cl | 80   | 24   | 3              | 90.3     | 98.1                    |
| 2                 | CH <sub>3</sub> CN               | 80   | 24   | 3              | 76.5     | 94.2                    |
| 3                 | C <sub>6</sub> H <sub>5</sub> CN | 80   | 24   | 3              | 85.7     | 96.6                    |
| 4                 | C <sub>6</sub> H <sub>5</sub> Cl | 50   | 24   | 3              | 52.4     | 96.1                    |
| 5                 | C <sub>6</sub> H <sub>5</sub> Cl | 60   | 24   | 3              | 67.8     | 97.4                    |
| 6                 | C <sub>6</sub> H <sub>5</sub> Cl | 70   | 24   | 3              | 78.8     | 95.7                    |
| 7                 | C <sub>6</sub> H <sub>5</sub> Cl | 80   | 12   | 3              | 54.6     | 98.5                    |
| 8                 | C <sub>6</sub> H <sub>5</sub> Cl | 80   | 16   | 3              | 70.4     | 98.2                    |
| 9                 | C <sub>6</sub> H <sub>5</sub> Cl | 80   | 20   | 3              | 85.3     | 98.7                    |
| 10                | C <sub>6</sub> H <sub>5</sub> Cl | 80   | 24   | 0              | trace    | trace                   |
| 11                | C <sub>6</sub> H <sub>5</sub> Cl | 80   | 24   | 2.5            | 84.9     | 96.8                    |
| 12                | C <sub>6</sub> H <sub>5</sub> Cl | 80   | 24   | 3.75           | 94.4     | 90.3                    |
| 13 <sup>[c]</sup> | C <sub>6</sub> H <sub>5</sub> Cl | 80   | 24   | 3              | 75.5     | 97.5                    |
| 14 <sup>[d]</sup> | C <sub>6</sub> H <sub>5</sub> Cl | 80   | 24   | 3              | 90.7     | 97.6                    |
| 15 <sup>[e]</sup> | C <sub>6</sub> H <sub>5</sub> Cl | 80   | 24   | -              | -        | -                       |
| 16 <sup>[f]</sup> | C <sub>6</sub> H <sub>5</sub> Cl | 80   | 24   | 3              | 34.2     | 73.1                    |
| 17 <sup>[g]</sup> | C <sub>6</sub> H <sub>5</sub> Cl | 80   | 24   | 3              | 56.7     | 89.3                    |

[a] Reaction conditions: diphenylmethane (0.125 mmol), compound **1** (10 μmol), chlorobenzene (0.5 mL), *t*-BuOOH (0.375 mmol), 80 °C, 24 h; [b] Selectivity to ketones. The by-product was benzhydrol; [c] Reaction conditions: diphenylmethane (0.125 mmol), compound **1** (5 μmol), chlorobenzene (0.5 mL), *t*-BuOOH (0.375 mmol), 80 °C, 24 h; [d] diphenylmethane (0.125 mmol), compound **1** (15 μmol), chlorobenzene (0.5 mL), *t*-BuOOH (0.375 mmol), 80 °C, 24 h; [e] diphenylmethane (0.125 mmol), compound **1** (10 μmol), chlorobenzene (0.5 mL), 80 °C, 24 h; [f] diphenylmethane (0.125 mmol), chlorobenzene (0.5 mL), *t*-BuOOH (0.375 mmol), 80 °C, 24 h; [g] diphenylmethane (0.125 mmol), CoCl<sub>2</sub>·6H<sub>2</sub>O (10 μmol), chlorobenzene (0.5 mL), *t*-BuOOH (0.375

mmol), 80 °C, 24 h.

**Fig. S5.** The FT-IR spectra of compound **1** after catalytic cycles.

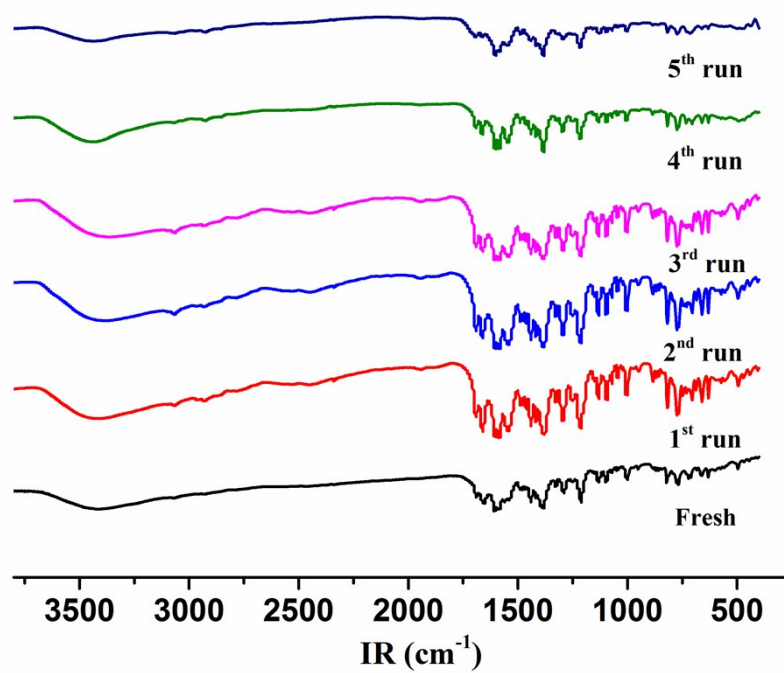

Supplement: c6dt04551k1.pdf [file c6dt04551k1.pdf]
